# Supplementary material
Source: PubMed Central journal article supplement (PMC4282971)

Figure S1

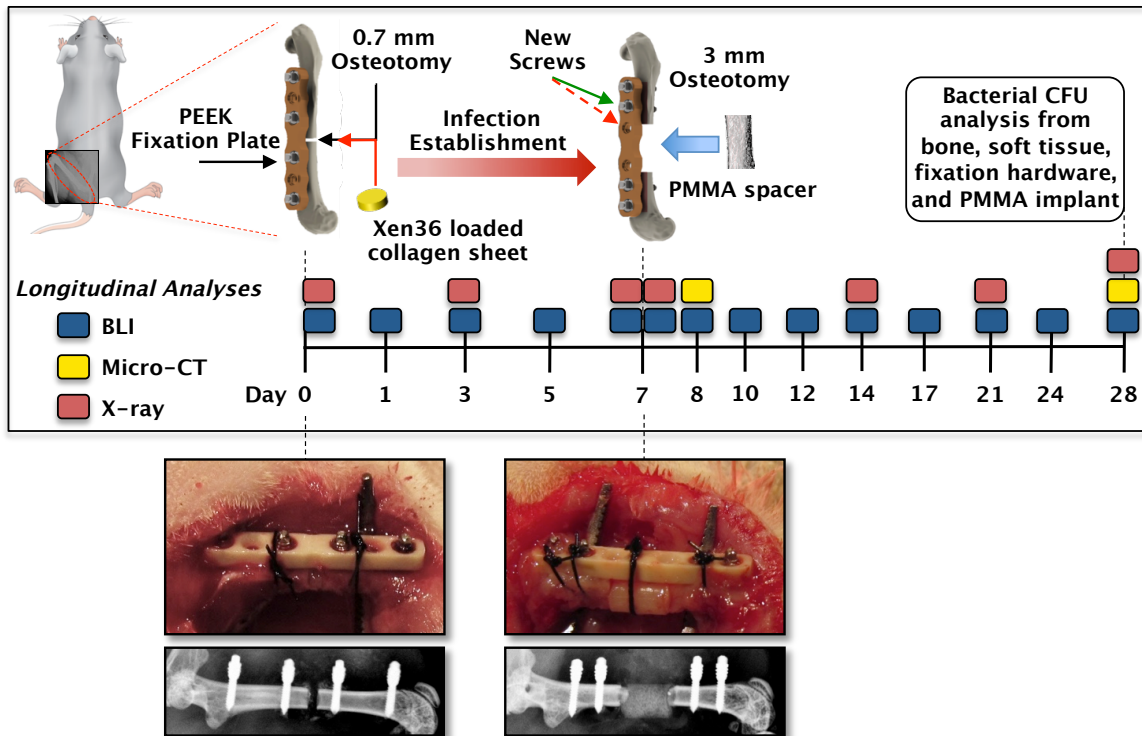

Figure S2

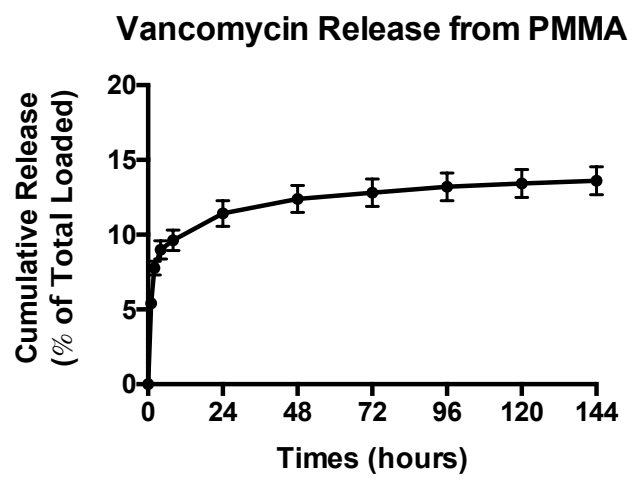

Figure S3

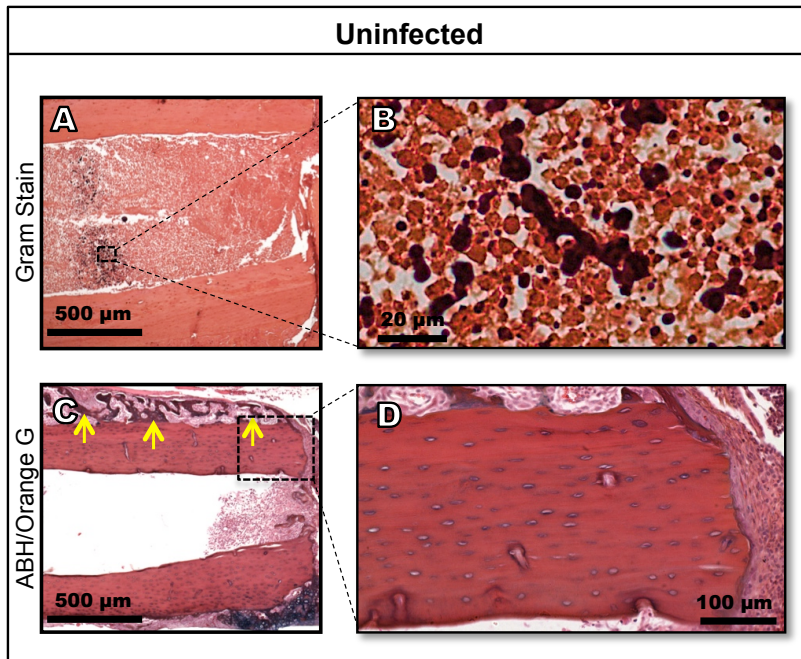

Supplement: NIHMS646576-supplement-01.pdf [file NIHMS646576-supplement-01.pdf]
